# Supplementary material
Source: HighWire-hosted journal article supplement (https://jech.bmj.com/content/72/1/21)
Supplement: inline-supplementary-material-1 [file inline-supplementary-material-1.pdf]

**Supplemental Table 1:** Regression Results of Scores by Cognitive Assessment (Basic Demographic and Fully Adjusted Models) among Older (Age 50+) Mexican Adults from the Mexican Health and Aging Study (n=13,023)

|                                                            | <i>Verbal Learning</i> |        | <i>Verbal Recall</i> |        | <i>Attention</i> |        | <i>Verbal Fluency</i> |        | <i>Orientation</i> |        |          |        |          |        |          |        |          |        |          |        |
|------------------------------------------------------------|------------------------|--------|----------------------|--------|------------------|--------|-----------------------|--------|--------------------|--------|----------|--------|----------|--------|----------|--------|----------|--------|----------|--------|
|                                                            | Model 1                |        | Model 4              |        | Model 1          |        | Model 4               |        | Model 1            |        | Model 4  |        |          |        |          |        |          |        |          |        |
|                                                            | $\beta$                | SE     | $\beta$              | SE     | $\beta$          | SE     | $\beta$               | SE     | $\beta$            | SE     | $\beta$  | SE     |          |        |          |        |          |        |          |        |
| <b>Demographic Covariates</b>                              |                        |        |                      |        |                  |        |                       |        |                    |        |          |        |          |        |          |        |          |        |          |        |
| Age                                                        | -0.04***               | (0.00) | -0.04***             | (0.00) | -0.07***         | (0.00) | -0.07***              | (0.00) | -0.51***           | (0.01) | -0.50*** | (0.01) | -0.12*** | (0.00) | -0.12*** | (0.00) | -0.02*** | (0.00) | -0.02*** | (0.00) |
| Female                                                     | 0.30***                | (0.02) | 0.32***              | (0.02) | 0.52***          | (0.03) | 0.53***               | (0.04) | -0.59**            | (0.22) | -0.07    | (0.24) | -0.55*** | (0.08) | -0.27**  | (0.09) | -0.06*** | (0.01) | -0.06*** | (0.02) |
| Years of Education                                         | 0.08***                | (0.00) | 0.08***              | (0.00) | 0.09***          | (0.00) | 0.09***               | (0.00) | 1.46***            | (0.03) | 1.37***  | (0.03) | 0.37***  | (0.01) | 0.34***  | (0.01) | 0.04***  | (0.00) | 0.04***  | (0.00) |
| <b>Locality Size (Ref: 100,000+)</b>                       |                        |        |                      |        |                  |        |                       |        |                    |        |          |        |          |        |          |        |          |        |          |        |
| 15,000-99,999                                              | -0.07*                 | (0.03) | -0.05                | (0.03) | -0.02            | (0.05) | 0.01                  | (0.05) | -1.48***           | (0.35) | -1.10**  | (0.35) | -0.29*   | (0.13) | -0.17    | (0.13) | 0.00     | (0.02) | 0.02     | (0.02) |
| 2,500-14,999                                               | -0.13***               | (0.03) | -0.10**              | (0.03) | -0.10            | (0.05) | -0.05                 | (0.06) | -2.10***           | (0.36) | -1.52*** | (0.37) | -0.73*** | (0.13) | -0.56*** | (0.14) | -0.00    | (0.02) | 0.03     | (0.02) |
| <2,500                                                     | -0.17***               | (0.03) | -0.13***             | (0.03) | -0.18***         | (0.05) | -0.12*                | (0.05) | -2.47***           | (0.33) | -1.62*** | (0.35) | -0.53*** | (0.12) | -0.31*   | (0.13) | -0.07*** | (0.02) | -0.02    | (0.02) |
| <b>Cooking Fuel (Ref: Gas)</b>                             |                        |        |                      |        |                  |        |                       |        |                    |        |          |        |          |        |          |        |          |        |          |        |
| Wood or Coal                                               | -0.18***               | (0.03) | -0.13***             | (0.04) | -0.11            | (0.06) | -0.07                 | (0.06) | -4.50***           | (0.39) | -3.27*** | (0.42) | -0.97*** | (0.14) | -0.68*** | (0.15) | -0.21*** | (0.02) | -0.12*** | (0.03) |
| <b>Household Wealth (Ref: 1st Quartile)</b>                |                        |        |                      |        |                  |        |                       |        |                    |        |          |        |          |        |          |        |          |        |          |        |
| 2nd Quartile                                               |                        |        | 0.07**               | (0.03) |                  |        | 0.05                  | (0.05) |                    |        | 0.37     | (0.31) |          |        | 0.22     | (0.11) |          |        | 0.07***  | (0.02) |
| 3rd Quartile                                               |                        |        | 0.10***              | (0.03) |                  |        | 0.07                  | (0.05) |                    |        | 1.02**   | (0.31) |          |        | 0.12     | (0.12) |          |        | 0.07***  | (0.02) |
| 4th Quartile (Highest)                                     |                        |        | 0.08**               | (0.03) |                  |        | -0.00                 | (0.05) |                    |        | 0.86**   | (0.32) |          |        | 0.35**   | (0.12) |          |        | 0.04*    | (0.02) |
| <b>Wall Material (Ref: Partition/Brick/Stone/Concrete)</b> |                        |        |                      |        |                  |        |                       |        |                    |        |          |        |          |        |          |        |          |        |          |        |
| Wood                                                       |                        |        | 0.04                 | (0.06) |                  |        | -0.04                 | (0.11) |                    |        | 0.11     | (0.74) |          |        | -0.05    | (0.26) |          |        | -0.01    | (0.05) |
| Adobe                                                      |                        |        | -0.11*               | (0.04) |                  |        | -0.17*                | (0.08) |                    |        | -0.15    | (0.51) |          |        | 0.22     | (0.19) |          |        | 0.00     | (0.03) |
| Other                                                      |                        |        | -0.18                | (0.10) |                  |        | -0.01                 | (0.18) |                    |        | -0.68    | (1.17) |          |        | -0.06    | (0.43) |          |        | 0.11     | (0.07) |
| <b>Roof (Ref: Concrete/Partition/Brick)</b>                |                        |        |                      |        |                  |        |                       |        |                    |        |          |        |          |        |          |        |          |        |          |        |
| Palm/Shingles/Wood                                         |                        |        | 0.14**               | (0.05) |                  |        | 0.14                  | (0.08) |                    |        | -0.27    | (0.56) |          |        | -0.30    | (0.20) |          |        | -0.03    | (0.03) |
| Asbestos/Metal Laminate                                    |                        |        | 0.06                 | (0.03) |                  |        | 0.02                  | (0.06) |                    |        | -0.47    | (0.38) |          |        | -0.24    | (0.14) |          |        | -0.03    | (0.02) |
| Other                                                      |                        |        | 0.22*                | (0.08) |                  |        | 0.16                  | (0.15) |                    |        | -0.95    | (0.97) |          |        | 0.15     | (0.35) |          |        | -0.15*   | (0.06) |
| <b>Floor Material (Ref: Wood/Mosaic/Other)</b>             |                        |        |                      |        |                  |        |                       |        |                    |        |          |        |          |        |          |        |          |        |          |        |
| Concrete                                                   |                        |        | -0.08***             | (0.02) |                  |        | -0.13***              | (0.04) |                    |        | -1.22*** | (0.26) |          |        | -0.31**  | (0.10) |          |        | -0.05**  | (0.02) |
| Mud                                                        |                        |        | -0.05                | (0.07) |                  |        | -0.04                 | (0.12) |                    |        | -1.57    | (0.82) |          |        | -0.84**  | (0.29) |          |        | -0.19*** | (0.05) |
| <b>Plumbing Type (Ref: Piped Inside)</b>                   |                        |        |                      |        |                  |        |                       |        |                    |        |          |        |          |        |          |        |          |        |          |        |
| Piped Outside                                              |                        |        | -0.05                | (0.03) |                  |        | -0.02                 | (0.06) |                    |        | -1.71*** | (0.37) |          |        | -0.32*   | (0.14) |          |        | -0.10*** | (0.02) |
| Unpiped                                                    |                        |        | -0.12*               | (0.06) |                  |        | -0.04                 | (0.10) |                    |        | -1.75*   | (0.69) |          |        | 0.04     | (0.25) |          |        | -0.13**  | (0.04) |
| <b>Insecticide Use</b>                                     |                        |        |                      |        |                  |        |                       |        |                    |        |          |        |          |        |          |        |          |        |          |        |
| Regular Use of Insecticide                                 |                        |        | -0.05*               | (0.02) |                  |        | -0.06                 | (0.03) |                    |        | 0.03     | (0.21) |          |        | 0.05     | (0.08) |          |        | -0.02    | (0.01) |
| <b>Health Covariates</b>                                   |                        |        |                      |        |                  |        |                       |        |                    |        |          |        |          |        |          |        |          |        |          |        |
| Chronic Condition Count                                    |                        |        | -0.01                | (0.01) |                  |        | -0.02                 | (0.02) |                    |        | -0.66*** | (0.12) |          |        | -0.05    | (0.04) |          |        | -0.00    | (0.01) |
| Former Smoker (Ref: Never)                                 |                        |        | 0.07**               | (0.02) |                  |        | 0.04                  | (0.04) |                    |        | 1.24***  | (0.27) |          |        | 0.73***  | (0.10) |          |        | 0.03     | (0.02) |
| Current Smoker (Ref: Never)                                |                        |        | 0.01                 | (0.03) |                  |        | 0.03                  | (0.05) |                    |        | 0.64     | (0.34) |          |        | 0.62***  | (0.13) |          |        | -0.06**  | (0.02) |
| Insured                                                    |                        |        | 0.12***              | (0.03) |                  |        | 0.08                  | (0.05) |                    |        | 0.05     | (0.34) |          |        | 0.17     | (0.12) |          |        | 0.06**   | (0.02) |

Note: Source: authors' own calculation using data from the Mexican Health and Aging Study (MHAS). SE: standard error. \* denotes  $p < 0.05$ , \*\* denotes  $p < 0.01$ , \*\*\* denotes  $p < 0.001$ . Sample size for verbal learning, verbal recall, attention, verbal fluency, and orientation are 12,929, 12,864, 11,993, 12,901, and 12,971, respectively.
