# Supplementary material
Source: HighWire-hosted journal article supplement (https://jech.bmj.com/content/72/1/21)
Supplement: inline-supplementary-material-2 [file inline-supplementary-material-2.pdf]

**Supplemental Table 2:** OLS Regressions of Scores across Cognitive Assessments in 2012 as a function of Use of Wood/Coal as Cooking Fuel versus Gas in 2001 and 2003 among Older Mexican Adults (Age 50+ in 2012)

**Cognitive Assessments in 2012 as a function of Cooking Fuel in 2001**

|                                  | Model 1 <sub>1</sub> |        | Model 2 <sub>2</sub> |        | Model 3 <sub>3</sub> |        | Model 4 <sub>4</sub> |        |
|----------------------------------|----------------------|--------|----------------------|--------|----------------------|--------|----------------------|--------|
|                                  | $\beta$              | SE     | $\beta$              | SE     | $\beta$              | SE     | $\beta$              | SE     |
| <i>Verbal Learning</i> (n=8,187) |                      |        |                      |        |                      |        |                      |        |
| Cooking Fuel: Wood or Coal       | -0.15***             | (0.04) | -0.14***             | (0.04) | -0.14**              | (0.05) | -0.13**              | (0.05) |
| <i>Verbal Recall</i> (n=8,135)   |                      |        |                      |        |                      |        |                      |        |
| Cooking Fuel: Wood or Coal       | -0.06                | (0.08) | -0.05                | (0.08) | -0.03                | (0.08) | -0.03                | (0.08) |
| <i>Attention</i> (n=7,416)       |                      |        |                      |        |                      |        |                      |        |
| Cooking Fuel: Wood or Coal       | -3.16***             | (0.49) | -2.95***             | (0.49) | -2.18***             | (0.52) | -2.26***             | (0.52) |
| <i>Verbal Fluency</i> (n=8,167)  |                      |        |                      |        |                      |        |                      |        |
| Cooking Fuel: Wood or Coal       | -0.83***             | (0.17) | -0.81***             | (0.17) | -0.65***             | (0.18) | -0.65***             | (0.18) |
| <i>Orientation</i> (n=8,232)     |                      |        |                      |        |                      |        |                      |        |
| Cooking Fuel: Wood or Coal       | -0.16***             | (0.03) | -0.14***             | (0.03) | -0.06                | (0.03) | -0.06                | (0.03) |

**Cognitive Assessments in 2012 as a function of Cooking Fuel in 2003**

|                                  | Model 1 <sub>1</sub> |        | Model 2 <sub>2</sub> |        | Model 3 <sub>3</sub> |        | Model 4 <sub>4</sub> |        |
|----------------------------------|----------------------|--------|----------------------|--------|----------------------|--------|----------------------|--------|
|                                  | $\beta$              | SE     | $\beta$              | SE     | $\beta$              | SE     | $\beta$              | SE     |
| <i>Verbal Learning</i> (n=8,080) |                      |        |                      |        |                      |        |                      |        |
| Cooking Fuel: Wood or Coal       | -0.12**              | (0.04) | -0.12**              | (0.04) | -0.10*               | (0.04) | -0.10*               | (0.04) |
| <i>Verbal Recall</i> (n=8,029)   |                      |        |                      |        |                      |        |                      |        |
| Cooking Fuel: Wood or Coal       | -0.16*               | (0.07) | -0.15*               | (0.07) | -0.14                | (0.08) | -0.14                | (0.08) |
| <i>Attention</i> (n=7,316)       |                      |        |                      |        |                      |        |                      |        |
| Cooking Fuel: Wood or Coal       | -2.71***             | (0.48) | -2.57***             | (0.48) | -1.89***             | (0.50) | -1.89***             | (0.50) |
| <i>Verbal Fluency</i> (n=8,062)  |                      |        |                      |        |                      |        |                      |        |
| Cooking Fuel: Wood or Coal       | -0.90***             | (0.17) | -0.88***             | (0.17) | -0.72***             | (0.18) | -0.70***             | (0.18) |
| <i>Orientation</i> (n=8,232)     |                      |        |                      |        |                      |        |                      |        |
| Cooking Fuel: Wood or Coal       | -0.16***             | (0.03) | -0.14***             | (0.03) | -0.06                | (0.03) | -0.06                | (0.03) |

Note: Source: authors' own calculation using data from the Mexican Health and Aging Study (MHAS). SE: standard error. Control variables come from 2012. <sub>1</sub>: Model 1 includes: age, sex, years of education, and locality size. <sub>2</sub>: Model 2 adds household wealth quartile. <sub>3</sub>: Model 3 adds floor material, wall material, ceiling material, plumbing type, and insecticide use. <sub>4</sub>: Model 4 adds chronic condition count, smoking behavior, and health insurance coverage. \* denotes p<0.05, \*\* denotes p<0.01, \*\*\* denotes p<0.001.
